# Supplementary material for: An improved mechanistic model for ammonia volatilization in Earth system models: Flow of Agricultural Nitrogen version 2 (FANv2)
Source: Copernicus journal article supplement (doi:10.5194/gmd-13-4459-2020), 2020-09-24
Supplement: Supplementary file 2 [file gmd-13-4459-2020-supplement.zip]

Archive with 6 entries (5 files):
- gmd-13-4459-2020-supplement-title-page.pdf
- supplement.to_prod_v1/
- supplement.to_prod_v1/README
- supplement.to_prod_v1/fan_nitrogen_f19_c20190325.nc
- supplement.to_prod_v1/supplement.pdf
- supplement.to_prod_v1/nh3_emission_c20200524.nc
