# Supplementary material for: An improved mechanistic model for ammonia volatilization in Earth system models: Flow of Agricultural Nitrogen version 2 (FANv2)
Source: Copernicus journal article supplement (doi:10.5194/gmd-13-4459-2020), 2020-09-24
Supplement: Supplementary file 2 [file gmd-13-4459-2020-supplement.zip › gmd-13-4459-2020-supplement-title-page.pdf]

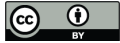

## *Supplement of*

# **An improved mechanistic model for ammonia volatilization in Earth system models: Flow of Agricultural Nitrogen version 2 (FANv2)**

**Julius Vira et al.**

*Correspondence to:* Julius Vira ([julius.vira@gmail.com](mailto:julius.vira@gmail.com))

- [gmd-13-4459-2020-supplement-title-page.pdf](#)
- [supplement.to\\_prod\\_v1](#)
  - [README](#)
  - [fan\\_nitrogen\\_f19\\_c20190325.nc](#)
  - [nh3\\_emission\\_c20200524.nc](#)
  - [supplement.pdf](#)

The copyright of individual parts of the supplement might differ from the CC BY 4.0 License.
